# Supplementary material for: Predicting Lyme Disease From Patients' Peripheral Blood Mononuclear Cells Profiled With RNA-Sequencing
Source: PubMed Central journal article supplement (PMC7982722; doi:10.3389/fimmu.2021.636289), 2021-03-08
Supplement: Data_Sheet_1.pdf [file Data_Sheet_1.pdf]

## Supplementary Material

### 1 Supplementary Figures

A

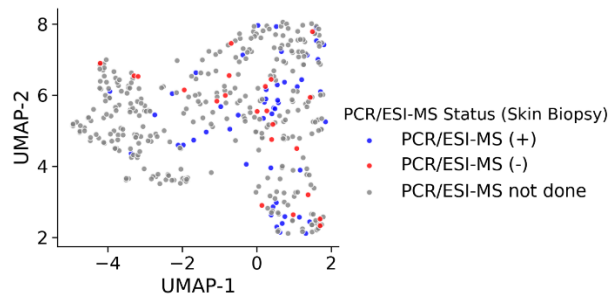

B

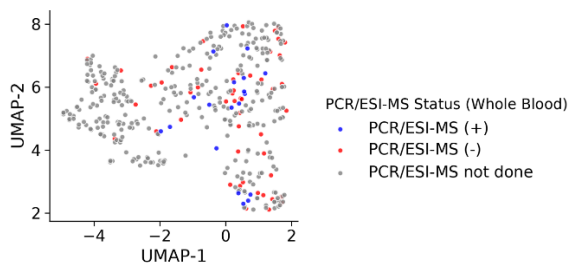

**Supplementary Figure 1.** UMAP projection of all samples collected for the study based on RNA-seq expression where each sample, representing a patient at a specific visit, is colored by positive (blue), negative (red) detection of antigens via PCR/ESI-MS in the (A) skin or (B) blood. Samples marked in gray did not have this test done. This test was applied to 68/72 of the patients during their first visit.

**A**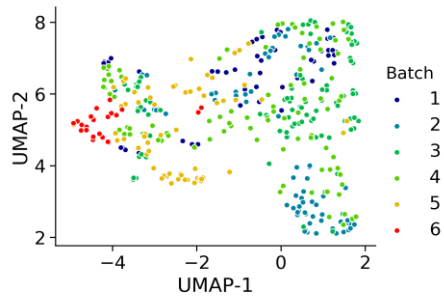**B**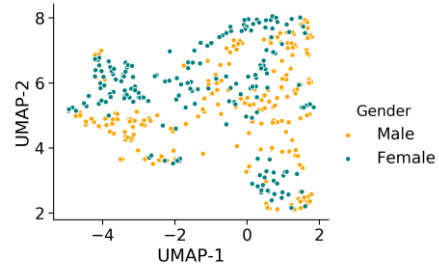**C**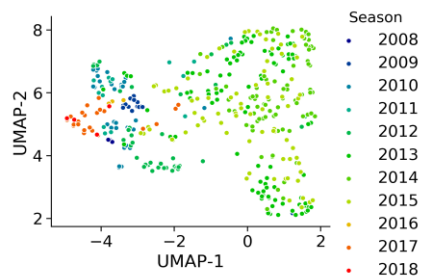

**Supplementary Figure 2.** UMAP projection of all samples collected for the study based on RNA-seq expression where each sample, representing a patient at a specific visit, is colored by (A) batch; (B) gender; and (C) season.

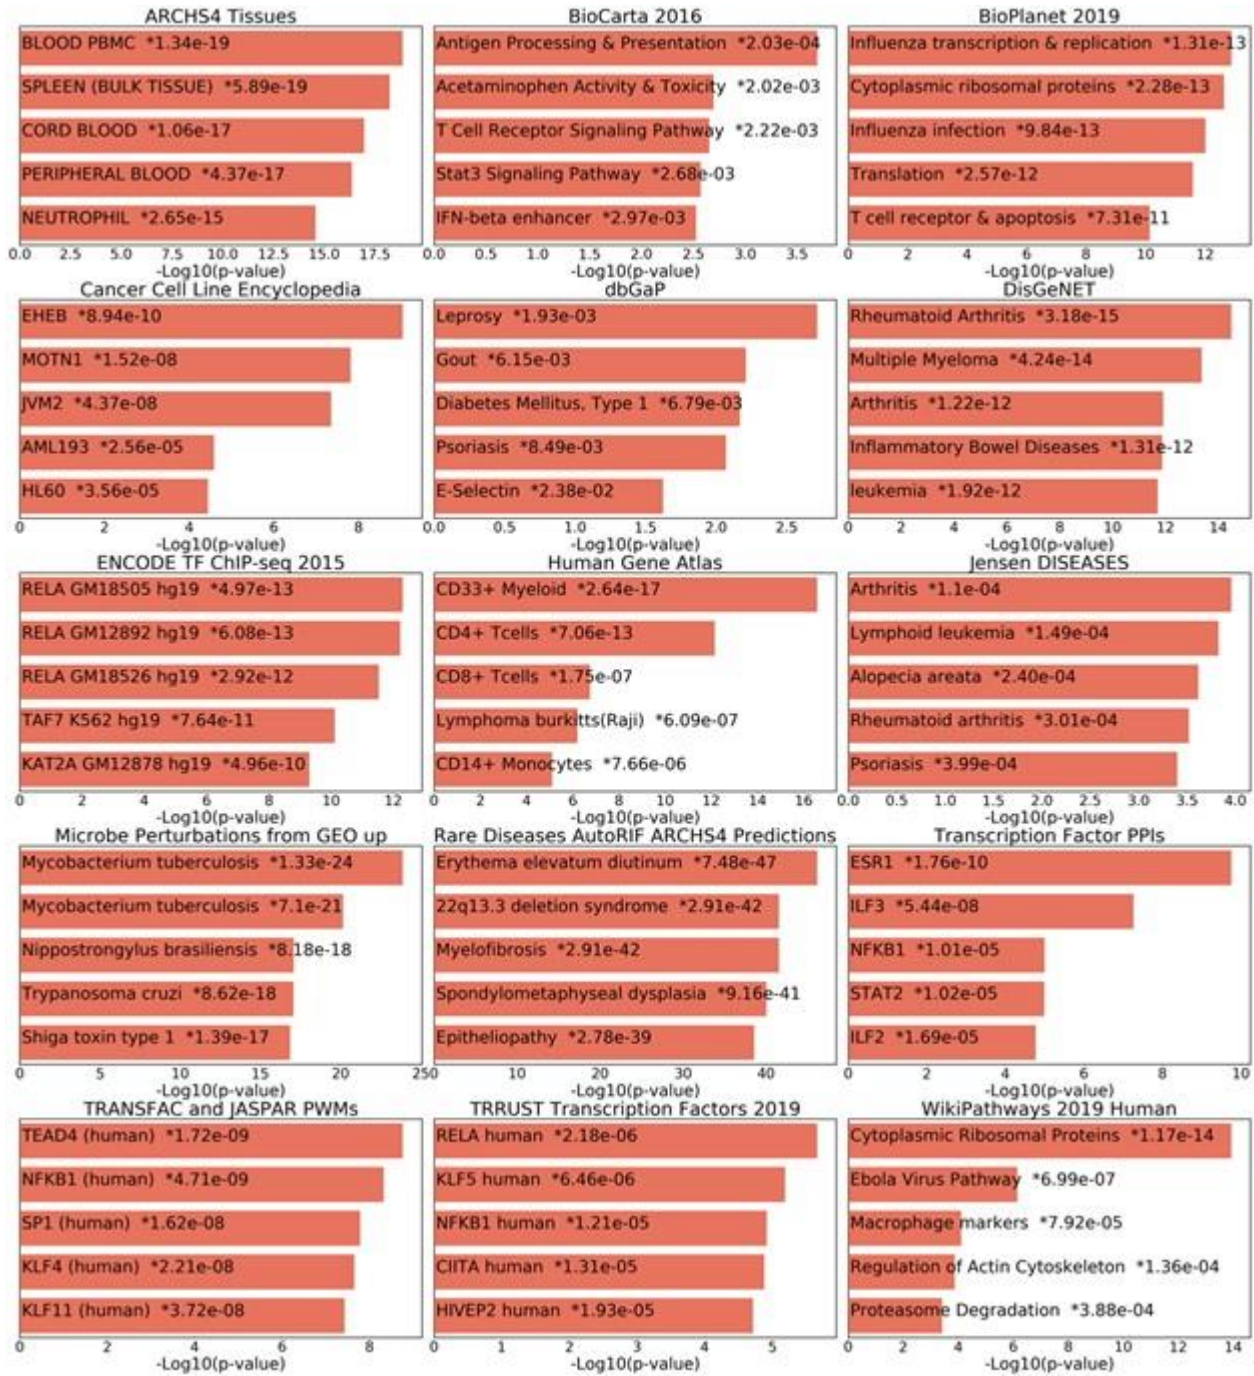

**Supplementary Figure 3.** Top 5 enriched terms in multiple gene set libraries for the top 200 up-regulated genes in LD cases based on Enrichr analysis.

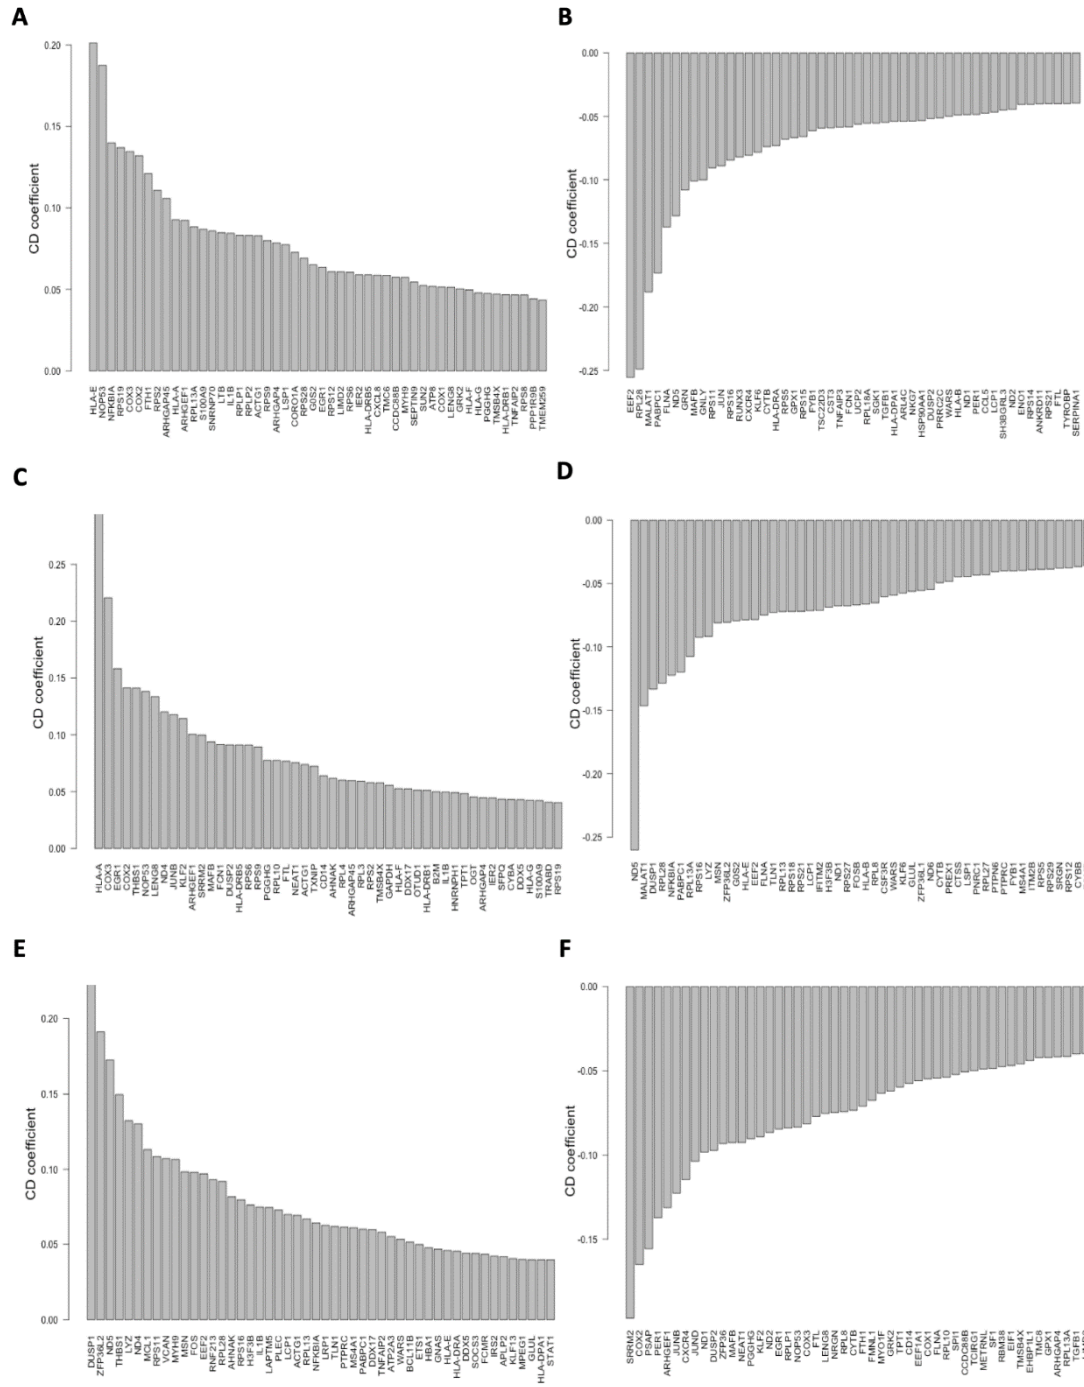

**Supplementary Figure 4.** Top ranked up-regulated and down-regulated differentially expressed genes between all pairwise comparisons of clusters based on the Characteristic Direction method. (A) Cluster 1 Up-regulated Genes (vs. Cluster0) / Cluster 0 Down-regulated Genes (vs. Cluster 1). (B) Cluster 1 Down-regulated Genes (vs. Cluster 0) / Cluster 0 Up-regulated Genes (vs. Cluster 1). (C) Cluster 1 Up-regulated Genes (vs. Cluster 2) / Cluster 2 Down-regulated Genes (vs. Cluster 1). (D) Cluster 1 Down-regulated Genes (vs. Cluster 2) / Cluster 2 Up-regulated Genes (vs. Cluster 1). (E) Cluster 2 Up-regulated Genes (vs. Cluster 0) / Cluster 0 Down-regulated Genes (vs. Cluster 2). (F) Cluster 2 Down-regulated Genes (vs. Cluster 0) / Cluster 0 Up-regulated Genes (vs. Cluster 2).



**A**

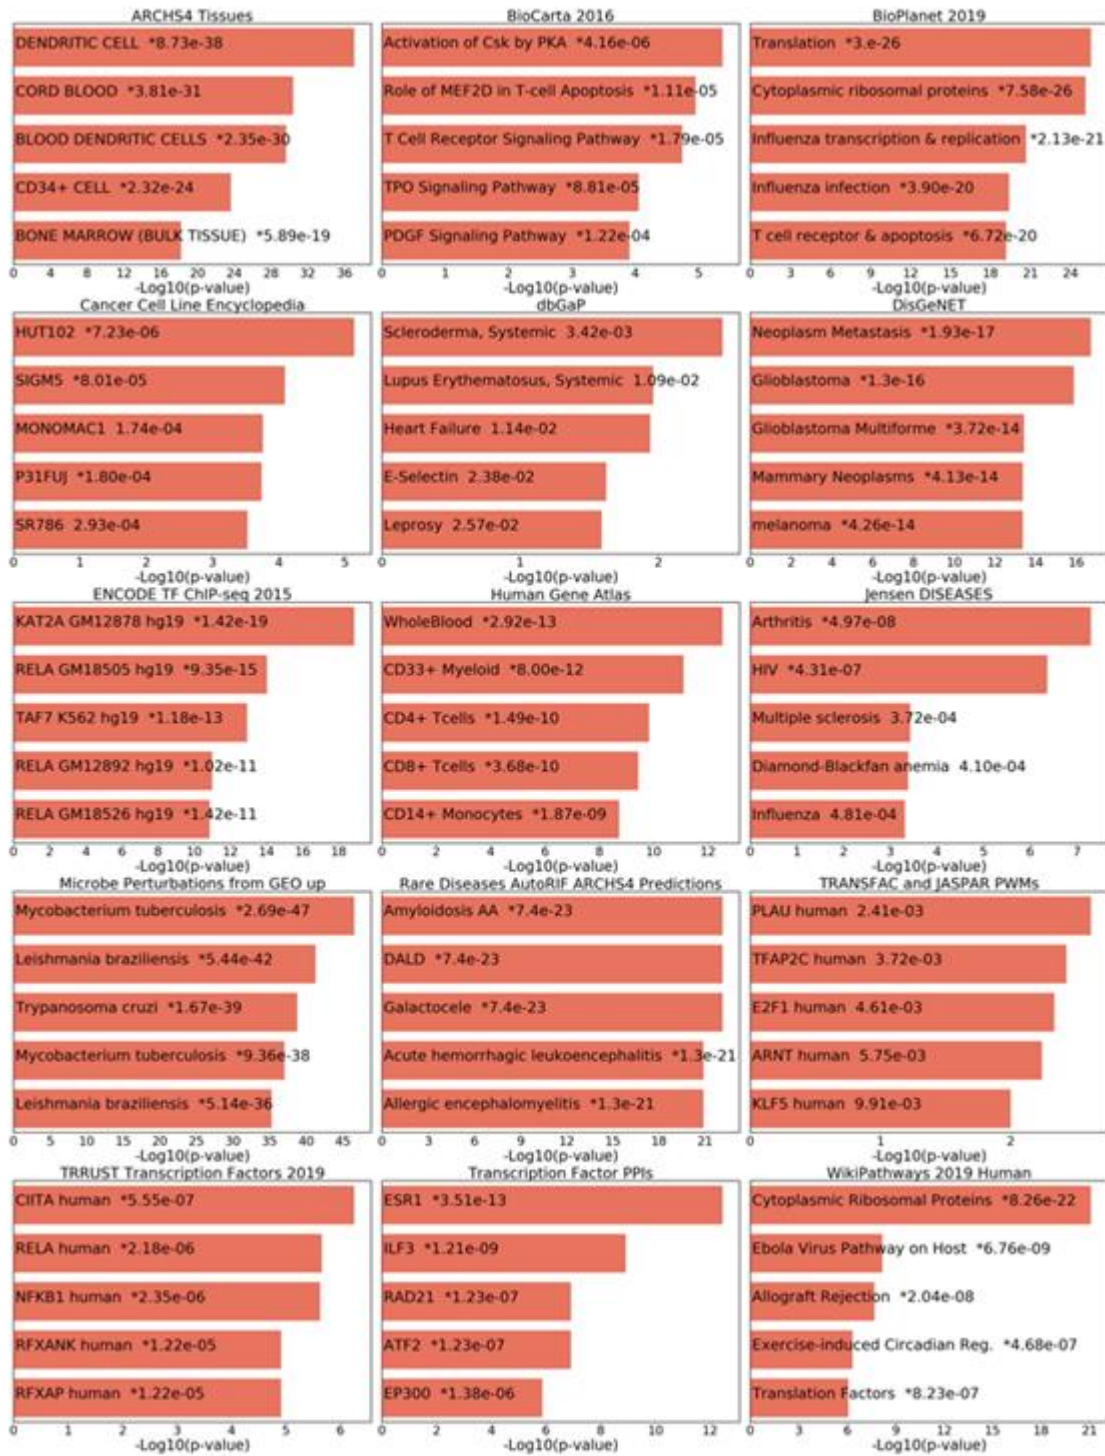

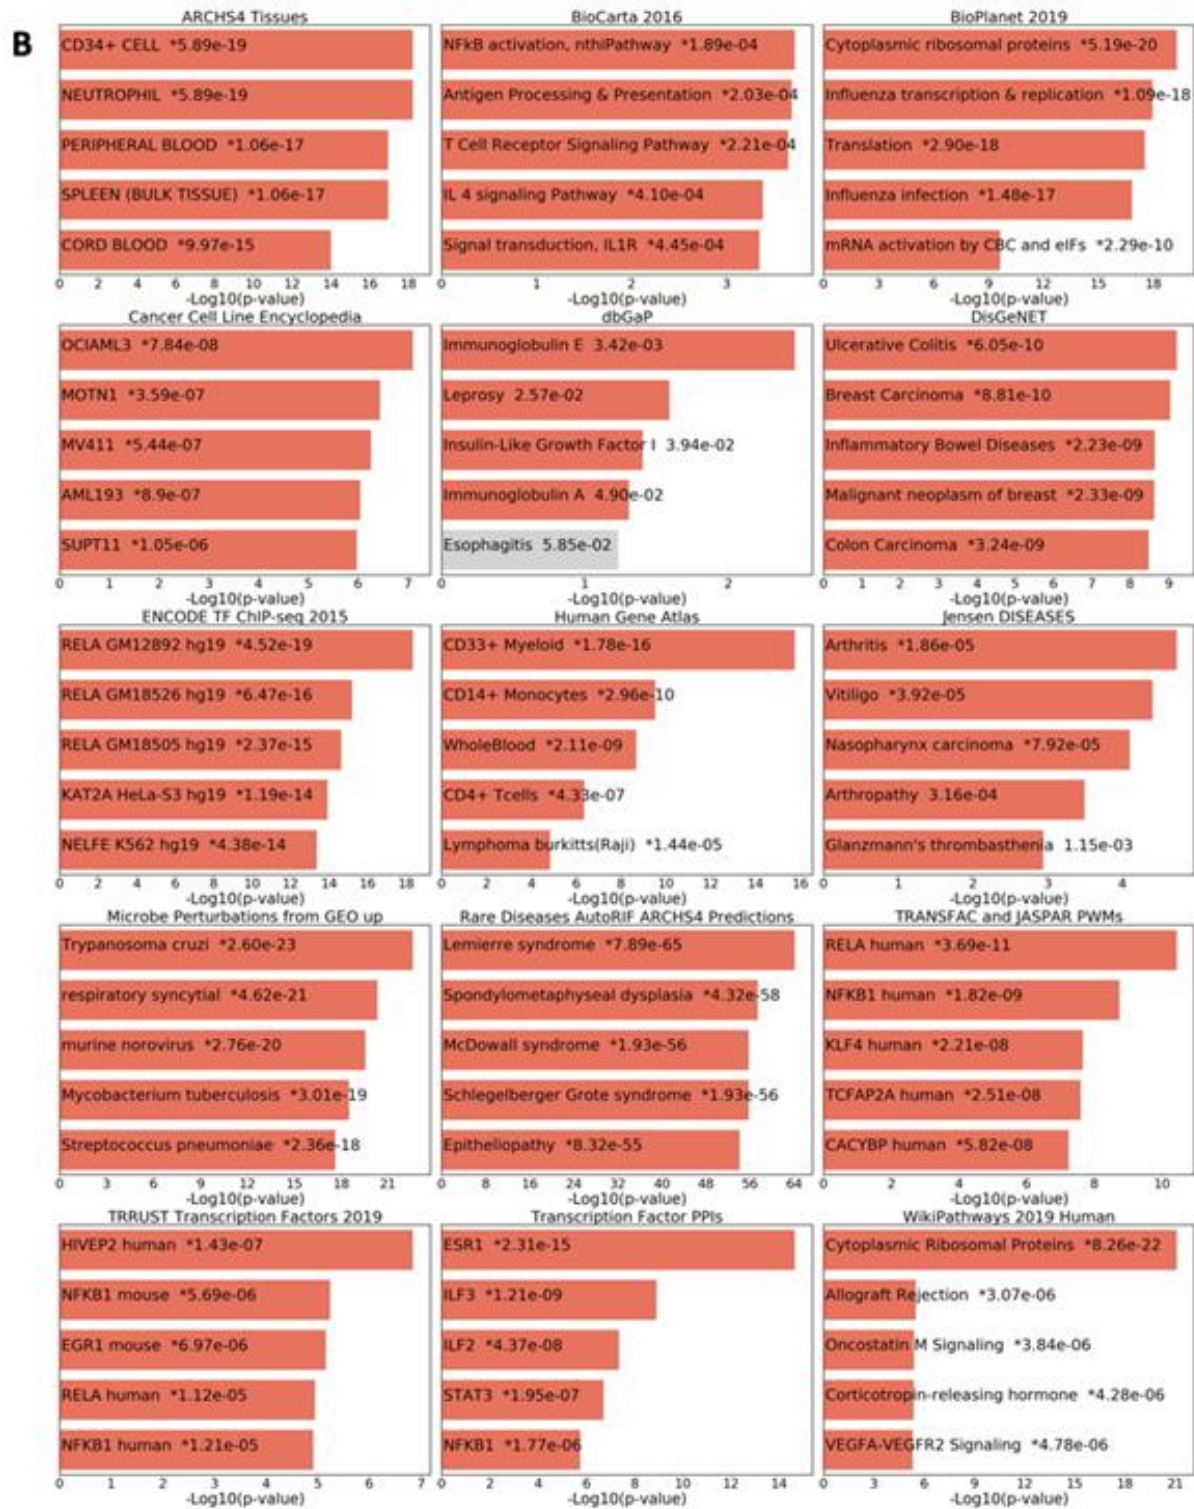

**Supplementary Figure 5.** Top 5 enriched terms in multiple gene set libraries based on Enrichr analysis for the top 200 up-regulated genes in (A) cluster 0 when compared to cluster 1 and (B) cluster 1 when compared to cluster 0.
